# Supplementary material for: Explosives sensing using Ag–Cu alloy nanoparticles synthesized by femtosecond laser ablation and irradiation
Source: Royal Society of Chemistry journal article supplement (doi:10.1039/c8ra08462a), 2019-01-01
Supplement: c8ra08462a1.pdf [file c8ra08462a1.pdf]

## Supporting Information

# Explosives Sensing Using Ag-Cu alloy Nanoparticles Synthesized by Femtosecond Laser Ablation and Irradiation

Moram Sree Satya Bharati, Byram Chandu, and Soma Venugopal Rao \*

Advanced Centre for Research in High Energy Materials (ACRHEM),

University of Hyderabad, Prof. C. R. Rao Road, Hyderabad 500046, Telangana, India

\*Corresponding author e-mail: [soma\\_venu@uohyd.ac.in](mailto:soma_venu@uohyd.ac.in) OR [soma\\_venu@yahoo.com](mailto:soma_venu@yahoo.com)

**Figure S1:** UV-visible absorption spectra of non-irradiated Ag and Cu NPs mixer and Ag-Cu NPs at different laser irradiation times 15, 30 and 60 minutes.

**Figure S2:** XRD pattern of Ag, Cu and Ag-Cu NPs.

**Figure S3:** Enhancement factor comparison histogram for MB (5  $\mu$ M) by using Ag, Cu and Ag-Cu alloy NP substrates

**Figure S4:** Reproducibility SERS spectra of MB (5 nM)

**Figure S5:** Reproducibility SERS spectra of PA (5  $\mu$ M)

**Figure S6:** Reproducibility SERS spectra of AN (5  $\mu$ M)

**Table S1:** Ammonium nitrate Raman shifts ( $\text{cm}^{-1}$ ) and their Assignments

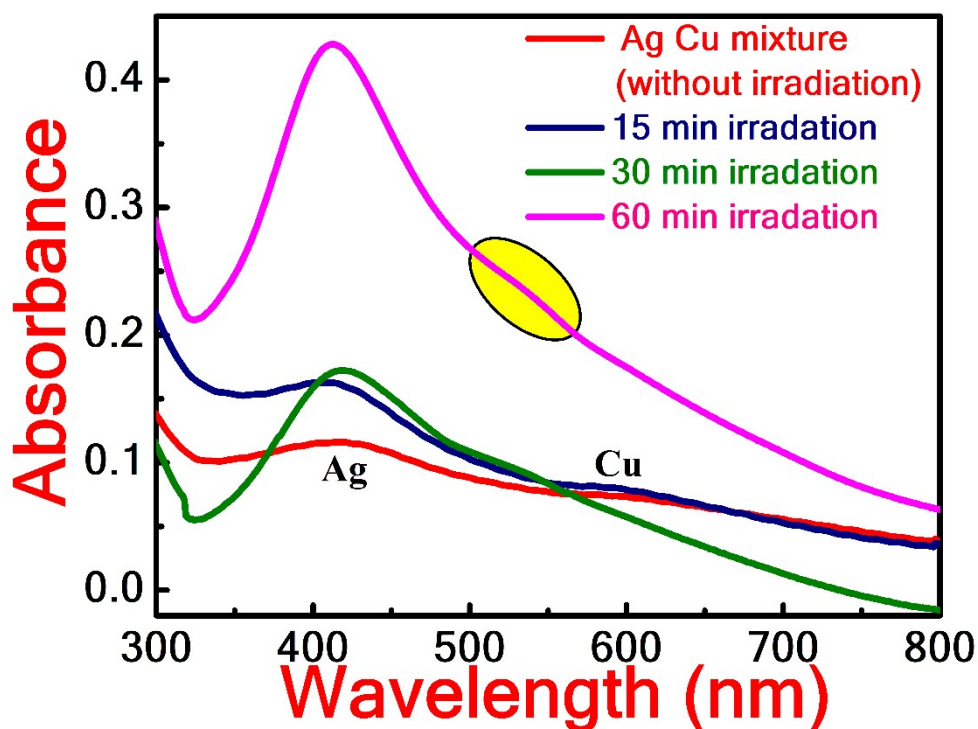

**Figure S1.** UV-visible absorption spectra of non-irradiated Ag and Cu NPs mixer and Ag-Cu NPs at different laser irradiation times 15, 30 and 60 minutes.

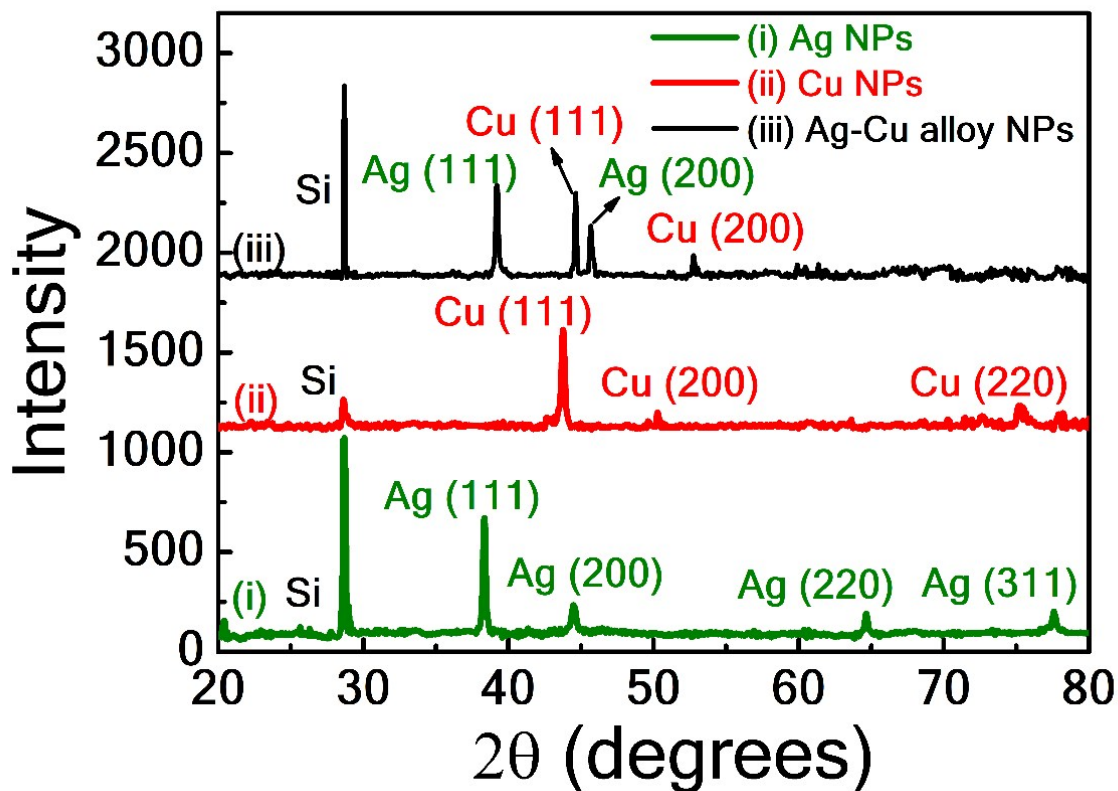

**Figure S2:** XRD pattern of (i) Ag NPs (green), (ii) Cu NPs (Red) and (iii) Ag-Cu NPs (Black)

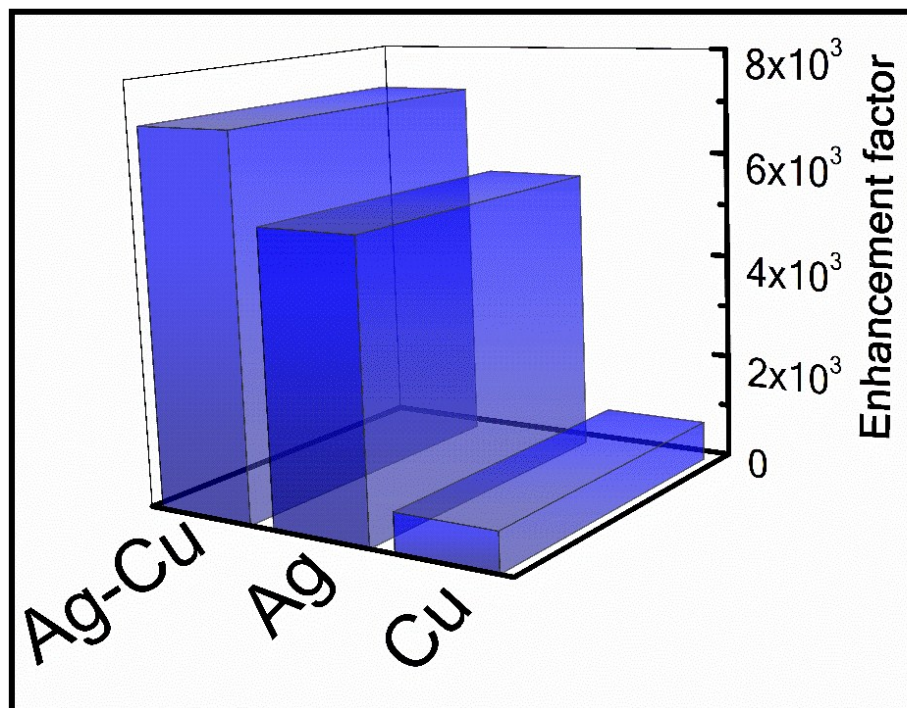

**Figure S3 .** Enhancement factor comparison histogram for MB ( $5 \mu\text{M}$ ) by using Ag, Cu and Ag-Cu alloy NP substrates.

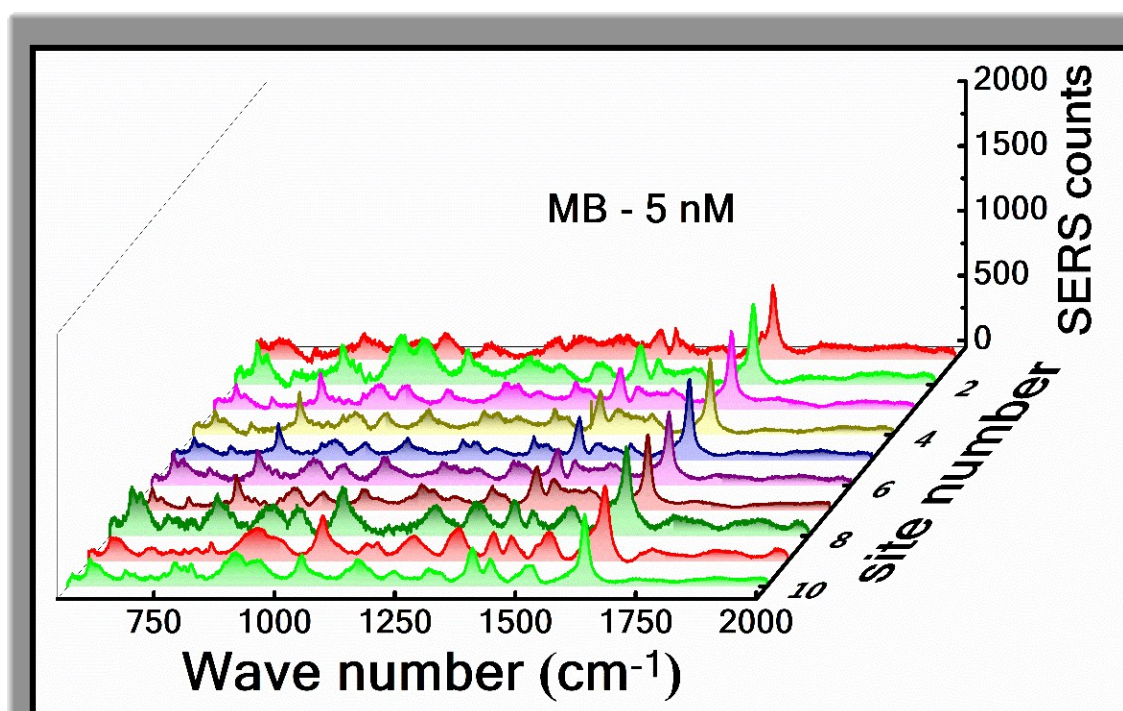

**Figure S4.** Reproducibility of the SERS spectra of MB ( $5 \text{ nM}$ ) absorbed on Ag-Cu alloy NPs recorded from 10 different positions.



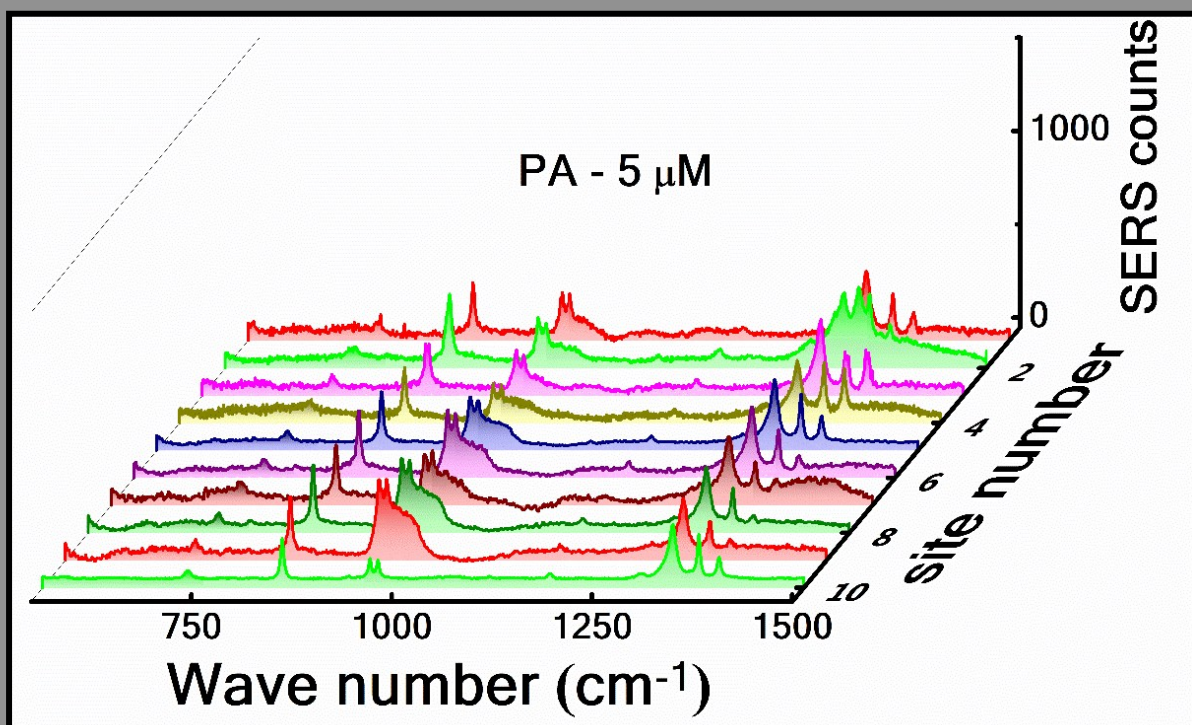

**Figure S5.** Reproducibility SERS spectra of PA (5  $\mu\text{M}$ ) absorbed on Ag-Cu alloy NPs recorded from 10 different positions.

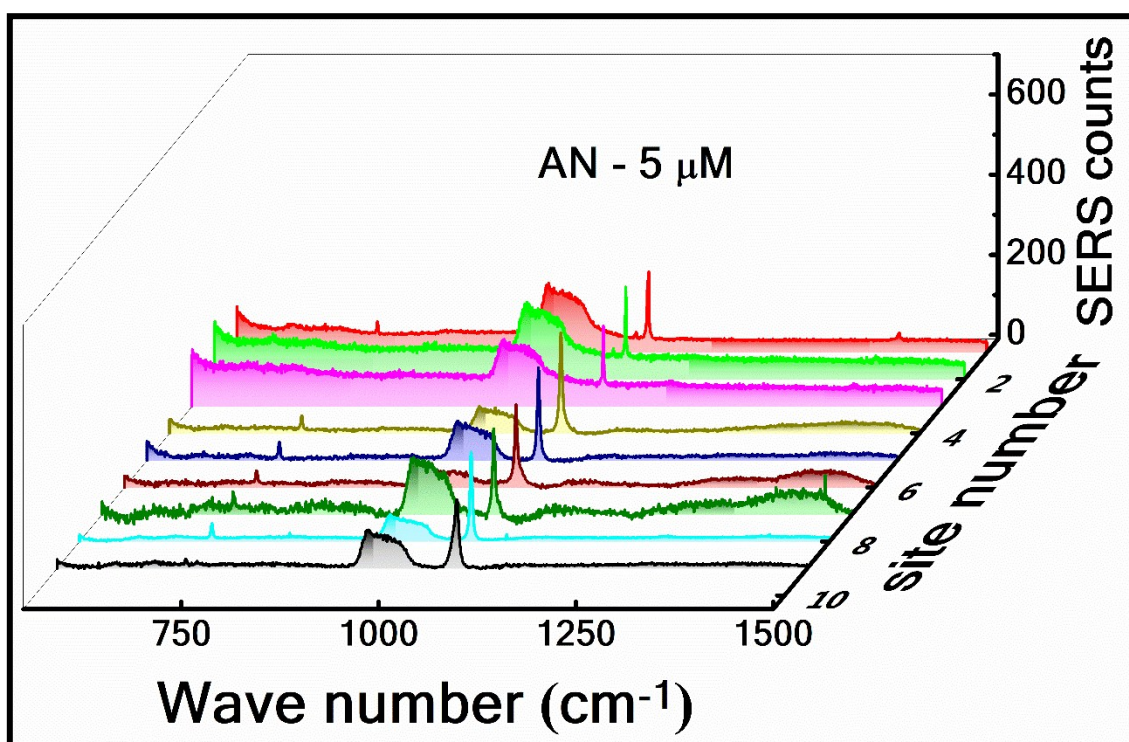

**Figure S6.** Reproducibility SERS spectra of AN 5  $\mu\text{M}$  absorbed on Ag-Cu alloy NPs recorded from 10 different positions.

**Table S1.** Ammonium nitrate Raman shifts ( $\text{cm}^{-1}$ ) and their assignments:<sup>1</sup>

| <b>S.NO</b> | <b>Reported<br/>(<math>\text{cm}^{-1}</math>)</b> | <b>Observed for<br/>0.1M on glass</b> | <b>Observed<br/>SERS</b> | <b>Peak Assignments</b>           |
|-------------|---------------------------------------------------|---------------------------------------|--------------------------|-----------------------------------|
| 1           | 713                                               | 712                                   | 712                      | $\text{NO}_3^-$ Deformation       |
| 2           | 1048                                              | 1045                                  | 1053                     | $\text{NO}_3^-$ Symmetric stretch |

## References

1. M. E. Farrell, E. L. Holthoff and P. M. Pellegrino, *Applied Spectroscopy*, 2014, **68**, 287-296.
